1 **The value of non-motor features and genetic variants of Parkinson's disease for**  
2 **clustering Lewy body diseases**

3 **Authors:** Olaia Lucas-Jiménez, MSc<sup>1</sup>, Ibai Diez, PhD<sup>2,3</sup>, Natalia Ojeda, PhD<sup>1</sup> Naroa  
4 Ibarretxe-Bilbao, PhD<sup>1</sup>, Javier Peña, PhD<sup>1</sup>, Beatriz Tijero, MD, PhD<sup>4</sup>, Marta Galdós,  
5 MD<sup>5</sup>, Ane Murueta-Goyena, PhD<sup>4</sup>, Rocío Del Pino, PhD<sup>4</sup>, Marian Acera, MSc<sup>4</sup>, Juan  
6 Carlos Gómez-Esteban, MD, PhD<sup>4</sup>, Iñigo Gabilondo, MD, PhD<sup>4\*</sup>

7

8 <sup>1</sup>Department of Methods and Experimental Psychology, Faculty of Psychology and  
9 Education, University of Deusto, Bilbao, Spain; <sup>2</sup>Department of Neurology,  
10 Massachusetts General Hospital, Harvard Medical School, Boston, MA 02114;  
11 <sup>3</sup>Neurotechnology Laboratory, Tecnalia Health Department, Derio, Spain;  
12 <sup>4</sup>Neurodegenerative Diseases Group, Biocruces-Bizkaia Health Research Institute,  
13 Barakaldo, Bizkaia, Spain; <sup>5</sup>Ophthalmology Department, Cruces University Hospital,  
14 Barakaldo, Bizkaia, Spain

15

16 **\*Corresponding author:**

17 Iñigo Gabilondo, Neurodegenerative Diseases Group, Biocruces-Bizkaia Health  
18 Research Institute, Plaza de Cruces 12, Barakaldo (Bizkaia), CP 48903, Spain

19 Corresponding author's phone and fax: +34 946006000 ext. 7970

20 Corresponding author's e-mail: [igabilon@gmail.com](mailto:igabilon@gmail.com)

21

22 Research article

23 **Running head:** Non-motor and genetic features of PD to classify Lewy body diseases

24 **Word count:** Abstract: 244; **Text:** 3166; **References:** 39; **Tables:** 3; **Figures:** 1.

25

1 **ABSTRACT**

2 **Introduction:** The use of non-motor Parkinson's disease (PD) features and genetic PD  
3 variants for clustering analyses may refine the phenotypic classification of idiopathic  
4 Lewy body (LB) diseases.

5 **Methods:** One-hundred participants [n=7 E46K-SNCA (n=5 symptomatic and n=2  
6 asymptomatic), n=4 PARK2, n=3 LRRK2, n=8 dementia with Lewy bodies (DLB), n=48  
7 idiopathic PD (iPD), n=30 healthy controls (HC)] underwent a comprehensive evaluation  
8 of non-motor and motor PD features. Non-motor features were used to perform a  
9 hierarchical clustering analysis with patients and HC using a Scikit-learn toolkit.

10 **Results:** Clustering analysis suggested three clusters of subjects including Cluster 1 or  
11 "*Normal-to-mild*": young iPD (< 60 years) classified together with most HC and the  
12 variable LB burden genetic PD variants (PARK2 and LRRK2) characterized by having  
13 normal-to-mild cognitive disabilities and mild-to-moderate motor disability with few  
14 axial symptoms; Cluster 2 or "*Mild-to-moderate*": old iPD patients (>60 years) classified  
15 together with the lowest symptomatic E46K-SNCA, PARK2 carriers and HCs,  
16 characterizing by having mild-to-moderate cognitive and motor disabilities with few axial  
17 symptoms; and Cluster 3 or "*Severe*": old iPD (>60 years) classified together with all  
18 DLB and the most symptomatic E46K-SNCA carriers, characterized by having severe  
19 pattern-specific cognitive disabilities (visual attention, perception, processing speed,  
20 memory and executive functions) and severe motor PD manifestations with marked axial  
21 symptoms.

22 **Conclusions:** Our study supports the potential value of incorporating genetic PD variants  
23 in data-driven iPD classification algorithms and the usefulness of non-motor PD features,  
24 especially visual cognition abnormalities, to facilitate the identification of aggressive LB  
25 diseases.

1 **Keywords:** Lewy bodies, Parkinson's disease, cognition, genetic, clustering analysis

## 1 1. INTRODUCTION

2            Parkinson's disease (PD) is a heterogeneous condition with marked variability in  
3 terms of clinical presentation and disease progression. Current PD classification  
4 perspectives extend far beyond the classically accepted phenotypes based on the  
5 predominance, severity and progression of motor features [1,2,3,4]. In fact, non-motor  
6 PD clinical features such as cognitive abnormalities, apathy, depression, anxiety,  
7 psychotic manifestations, REM sleep behavior disorder, olfactory dysfunction or  
8 dysautonomia are now becoming essential to define PD phenotypes, since they are key  
9 predictors of disease progression and quality of life [5]. However, the use of exclusively  
10 clinical data to define PD subtypes may be insufficient [6]. One of the main reasons for  
11 the clinical heterogeneity of PD may be the existence of biologically distinct subtypes of  
12 PD. The identification of such biological PD subtypes is of foremost importance since it  
13 may favor the development of targeted specific disease-modifying and symptomatic  
14 treatments for PD. Therefore, the use of relevant biological data such as genotype  
15 information on PD classification paradigms might be extremely useful to refine PD  
16 clustering classification algorithms.

17            Only two publications, both based on data from Parkinson's Progression Markers  
18 Initiative (PPMI), have evaluated the presence of specific genetic PD variants in  
19 parkinsonian patients classified through cluster analysis [7,8]. Both studies analyzed the  
20 relative distribution of mutation carriers for glucocerebrosidase (GBA) and Leucine-Rich  
21 Repeat Kinase 2 (LRRK2) genes among identified PD clusters. In addition, one of such  
22 studies [7] applied genetic information as an extra clustering feature using a single genetic  
23 indicator termed 'genetic risk score' that had been previously calculated for PPMI cohort  
24 [9] and which consisted in the summation of the number of 28 common risk variants for  
25 PD across 24 loci from genome-wide analyses [10] plus two additional GBA and LRRK2

1 risk variants detected within PPMI. The key pathological feature of the most aggressive  
2 idiopathic PD (iPD) phenotypes is the presence of high burdens of Lewy bodies (LB).  
3 However, GBA and specially LRRK2 gene mutation carriers have varying degrees of LB  
4 deposition in the CNS. Thus, the incorporation to cluster analyses of patients with PD  
5 mutations unambiguously associated to severe (E46K-SNCA) [11, 12] or absent LB  
6 pathology (PARK2) may favor the identification of clinical features and phenotypes  
7 linked to severe LB pathology in iPD.

8         Moreover, the evolution of cognitive impairment in patients with iPD appears to  
9 be heterogeneous, and it is important to determine whether specific domain impairment  
10 phenotypes can be identified that can characterize specific subgroups of patients which  
11 are more sensitive to faster conversion to dementia. Therefore, the objective of this study  
12 was to classify idiopathic LB diseases using an innovative cluster analysis with a  
13 comprehensive set of non-motor features, including an extensive cognitive evaluation,  
14 and involving three genetic PD variants with different degrees of LB pathology.

## 15 **2. METHODS**

### 16 **2.1. Study sample and general procedures**

17         One hundred participants were involved in the study: 7 E46K-SNCA, 4 PARK2  
18 and 3 LRRK2 carriers, 8 patients with probable DLB, 48 patients with idiopathic PD  
19 (iPD) and 30 healthy controls (HC). From the E46K-SNCA carriers, n=5 were  
20 symptomatic with motor and/or non-motor PD manifestations and n=2 were  
21 asymptomatic. All HC were recruited to approximately match older symptomatic E46K-  
22 SNCA carriers in age and sex. Participants were recruited in the Department of Neurology  
23 of Cruces University Hospital and in the PD Biscay Association (ASPARBI). iPD  
24 patients fulfilled Parkinson's UK Brain Bank criteria for the diagnosis of PD and DLB  
25 patients the diagnosis of probable DLB by revised criteria for the clinical diagnosis of

1 DLB. There was no family history of parkinsonism in first order relatives of HC, iPD or  
2 DLB patients. We did not include participants with progressive neurological disorders  
3 other than PD or any medically unstable condition or limiting psychiatric disease. An  
4 ophthalmologist excluded participants with any eye condition influencing visual or  
5 neuropsychological evaluations. All patients were studied in on-medication and in their  
6 optimal on-motor situation to comply with study evaluations. The study protocol was  
7 approved by the Basque Clinical Research Ethics Committee. In accordance with the  
8 Declaration of Helsinki, all subjects were volunteers and submitted written informed  
9 consent prior study participation.

## 10 **2.2. Non-motor symptoms evaluation**

### 11 **2.2.1. Cognitive features**

12 General cognition screening was assessed with Montreal Cognitive Assessment  
13 (MoCA)[13]. A comprehensive neuropsychological evaluation of five cognitive domains  
14 with the tests recommended by Movement Disorders Society criteria for diagnosis of mild  
15 cognitive impairment in PD[14] was also performed: *attention and working memory* with  
16 Digit Span Backwards test (DSb)[15] and Trail Making Test A (TMTA)[16]; *executive*  
17 *functions* with Modified Wisconsin Card Sorting Test (Categories) (MWCSTc)[17] and  
18 TMTB[16]; *language* with Calibrated Ideational Fluency Assessment [semantic fluency  
19 (SF) and letter fluency (LF)][18]; *memory* with Hopkins Verbal Learning Test  
20 (HVLt)[19] and Brief Visual Memory Test (BVMT)[20]; *visuospatial functions* with  
21 Benton's Judgment of Line Orientation Test (H-form) (BJLOTH)[21] and Clock Drawing  
22 Test order (CDTo)[22]. In addition, we measured *processing speed* with Symbol Digit  
23 Modalities Test (SDMT)[23] and Salthouse Perceptual Comparison Test (SPCT)[24].  
24 Outcome variables were converted to z scores to generate composites for each cognitive

1 domain. All composite cognitive domains maintained satisfactory internal consistency  
2 with Cronbach  $\alpha$  above 0.85 in all cases.

### 3 **2.2.2. Autonomic, olfactory, ophthalmological and clinical features**

4 We recorded orthostatic hypotension (OHT) with tilt table test, blood pressure  
5 recovery time (PRT) following termination of Valsalva maneuver back to baseline  
6 (seconds) [25], heart rate response (variability) to deep breathing (HRVdb) (measured as  
7 the mean heart rate range in 6 respiration cycles) [26] and olfaction with Brief Smell  
8 Identification Test (BSIT) [27]. Binocular low contrast visual acuity (LCVA) [2.5%  
9 Sloan charts at 4 meters (Precision Vision, La Salle, IL)] and photopic contrast sensitivity  
10 (PCS) [Pelli-Robson chart (Metropia Ltd., Cambridge, UK) at 1 meter with 280 lux chart  
11 luminance]] was measured. Moreover, depressive, apathy and fatigue symptoms were  
12 evaluated with Geriatric Depression Scale (GDS)[28], Lille Apathy Rating Scale  
13 (LARS)[29], and Fatigue Severity Scale (FSS)[30], respectively.

### 14 **2.3. Motor symptoms and PD-related features evaluation**

15 We measured disease duration, Hoehn & Yahr Scale, Unified Parkinson Disease  
16 Rating Scale (UPDRS) and levodopa equivalent daily dose (LEDD) [31].

### 17 **2.4. Selection of variables and clustering analysis**

18 To optimize the performance of clustering analyses, we selected the clinical  
19 variables that best differentiated patients and HC using Random Forest Classifier (RFC).  
20 According to RFC, we chose the following variables for hierarchical clustering analysis:  
21 age (demographics); BSIT (olfaction); OHT, PRT, HRVdb (autonomic testing); LCVA  
22 and OCS (visual function); GDS (depressive symptoms); DSb and TMTA (attention and  
23 working memory); MWCSTc and TMTB (executive functions); SF and LF (language);  
24 HVLT and BVMT (memory); BJLOTH and CDTo (visuospatial functions); SDMT and  
25 SPCT (processing speed). The former variables were converted to z scores to conduct

1 hierarchical clustering analysis, which was performed including all study subjects, both  
2 patients and HC. Features exclusively related to the disease were not included in the  
3 analysis and were used post-hoc to compare patients within clusters.

4 The hierarchical clustering analysis is based on a bottom up approach. Complete  
5 linkage criterion was used minimizing the maximum distance between observations of  
6 pairs of clusters.  $k = 3$  was selected to offer a good combination of model fit and  
7 parsimony. For each identified cluster, we obtained the average (centroid) z score of each  
8 variable included to perform hierarchical clustering analysis. All analyses were  
9 performed with Scikit-Learning [32] running under Python version 3.6.5.

## 10 **2.5. Data analysis**

11 Normality of data was tested using the Shapiro-Wilk test. Categorical data were  
12 analyzed with the Chi-squared ( $\chi^2$ ) test. Significant differences in variables were  
13 compared using the Analysis of Variance (ANOVA) test or Kruskal-Wallis test and two-  
14 tailed t-tests or U-Mann Whitney test for two-group comparisons. Differences between  
15 clusters were analyzed with  $\chi^2$  and ANOVA Tukey-corrected as post-hoc tests for  
16 pairwise comparisons. Statistical analyses were performed, using the statistical package  
17 SPSS program (IBM SPSS Statistics 22). In addition, to summarize the obtained clusters  
18 in graphical representations with only 2 variables defining each subject, we used two  
19 different dimensionality reduction techniques: principal component analysis (PCA) and  
20 linear discriminant analysis (LDA).

## 21 **3. RESULTS**

### 22 **3.1. General description of the whole sample**

23 The general characteristics of study participants are displayed in Table 1. In  
24 general terms, they were predominantly male (62.0%) and young (57.4 years). DLB  
25 patients were older than the other groups, with statistically significant ( $p < 0.05$ )



1 differences compared to E46K-SNCA carriers, PARK2, iPD and HC. iPD patients were  
 2 also older than genetic carriers and HC, although differences were statistically significant  
 3 only when compared to HC. Regarding overall cognitive status (MoCA), both DLB and  
 4 E46K-SNCA symptomatic carriers were the most affected, and there were not significant  
 5 differences between them. However, DLB patients showed significant lower cognitive  
 6 scores compared to E46K-SNCA asymptomatic carriers, iPD patients, PARK2 carriers  
 7 and HC. In addition, HC showed higher cognitive scores compared to E46K-SNCA  
 8 symptomatic carriers and iPD patients. In terms of PD-related motor status, most  
 9 diagnostic categories were comparable with UPDRS III ranging from 23.50 to 27.43 and  
 10 with Hoehn & Yahr stage between 2 and 2.5, except for E46K-SNCA asymptomatic  
 11 carriers and DLB (with respectively normal and severely affected motor status).

12 **Table 1. Demographical and Parkinson’s disease related data of study participants**

13

|                              | <b>E46K-SNCA symptomatic</b>  | <b>E46K-SNCA asymptomatic</b> | <b>LRRK2</b>      | <b>PARK2</b>                  | <b>iPD</b>                     | <b>DLB</b>                   | <b>HC</b>                    |
|------------------------------|-------------------------------|-------------------------------|-------------------|-------------------------------|--------------------------------|------------------------------|------------------------------|
| No. participants             | 5                             | 2                             | 3                 | 4                             | 48                             | 8                            | 30                           |
| Age (years)                  | 52.47 <sup>a</sup><br>(12.40) | 44.87 <sup>b</sup><br>(15.05) | 53.84<br>(11.17)  | 49.91 <sup>g</sup><br>(16.39) | 60.37 <sup>c,d</sup><br>(8.23) | 73.97 <sup>e</sup><br>(7.29) | 51.19<br>(12.68)             |
| Education (years)            | 15.40<br>(2.70)               | 16.00<br>(5.66)               | 9.33<br>(3.06)    | 11.25<br>(5.12)               | 10.33 <sup>d</sup><br>(4.15)   | 9.75<br>(4.23)               | 14.37<br>(4.97)              |
| Males, no (%)                | 3<br>(60.00)                  | 1<br>(50.00)                  | 2<br>(66.70)      | 3<br>(75.00)                  | 30<br>(62.50)                  | 6<br>(75.00)                 | 17<br>(56.67)                |
| MoCA                         | 20.80<br>(7.26)               | 29.50 <sup>b</sup><br>(.71)   | 24.00<br>(4.35)   | 25.75 <sup>g</sup><br>(3.40)  | 24.42 <sup>c,d</sup><br>(3.07) | 17.62 <sup>e</sup><br>(7.52) | 27.67 <sup>h</sup><br>(2.39) |
| Disease duration (years)     | 7.62<br>(5.19)                | ---                           | 5.10<br>(4.62)    | 8.03<br>(10.08)               | 6.38<br>(3.96)                 | 7.98<br>(5.76)               | ---                          |
| Age at disease onset (years) | 44.81 <sup>a</sup><br>(10.53) | ---                           | 48.70<br>(6.59)   | 41.85 <sup>g</sup><br>(21.79) | 53.95 <sup>c</sup><br>(7.88)   | 65.94<br>(9.53)              | ---                          |
| UPDRS I                      | 4.60                          | 0                             | 1.00 <sup>f</sup> | 1.00 <sup>g</sup>             | 2.28 <sup>c</sup>              | 5.29                         | ---                          |

|                             |                    |        |                    |                    |                    |                    |     |
|-----------------------------|--------------------|--------|--------------------|--------------------|--------------------|--------------------|-----|
|                             | (2.07)             | (0)    | (1.00)             | (1.00)             | (1.78)             | (2.06)             |     |
| UPDRS II                    | 14.60              | 0      | 13.00              | 11.00              | 12.17              | 16.29              |     |
|                             | (9.81)             | (0)    | (10.15)            | (6.08)             | (6.56)             | (5.94)             |     |
| UPDRS III                   | 27.00              | 1.00   | 26.33              | 23.33              | 27.46              | 37.14              |     |
|                             | (17.86)            | (1.41) | (8.96)             | (10.07)            | (11.20)            | (13.74)            |     |
| UPDRS IV                    | 4.80               | 0      | 6.00               | 3.00               | 4.48               | 2.43               |     |
|                             | (4.38)             | (0)    | (4.58)             | (3.46)             | (3.71)             | (2.57)             |     |
| Hoehn & Yahr (no. patients) |                    |        |                    |                    |                    |                    | --- |
| Stage 0                     | 1                  | 2      | 0                  | 0                  | 0                  | 0                  |     |
| Stage 1                     | 0                  | 0      | 0                  | 1                  | 4                  | 0                  |     |
| Stage 1.5                   | 0                  | 0      | 0                  | 1                  | 6                  | 0                  |     |
| Stage 2                     | 1                  | 0      | 2                  | 1                  | 15                 | 1                  |     |
| Stage 2.5                   | 2                  | 0      | 1                  | 0                  | 15                 | 3                  |     |
| Stage 3                     | 1                  | 0      | 0                  | 1                  | 7                  | 4                  |     |
| Stage 4                     | 0                  | 0      | 0                  | 0                  | 1                  | 0                  |     |
| LEDD (mg/day)               | 716.30<br>(635.99) | —      | 713.00<br>(357.98) | 380.00<br>(233.88) | 648.23<br>(395.23) | 570.00<br>(347.33) | --- |

1  
2 Results are presented as means (standard deviations) unless otherwise specified.  
3 Statistically significant ( $p < 0.05$ ) results for pairwise group comparisons with  $\chi^2$   
4 (proportions) or one-way ANOVA (means) are represented as: a. E46K-SNCA  
5 symptomatic vs DLB; b. E46K-SNCA asymptomatic vs DLB; c. iPD vs DLB; d. iPD vs  
6 HC; e. DLB vs HC; f. LRRK2 vs DLB; g. PARK2 vs DLB; h. E46K-SNCA symptomatic  
7 vs HC. Abbreviations: E46K-SNCA: E46K mutation in alpha-synuclein gene; “E46K-  
8 SNCA symptomatic”: symptomatic carriers of E46K mutation in alpha-synuclein gene;  
9 “E46K-SNCA asymptomatic”: asymptomatic carriers of E46K-SNCA; LRRK2: carriers  
10 of Leucine-Rich Repeat Kinase 2 gene mutations; PARK2: carriers of mutations in Parkin  
11 gene; iPD: idiopathic Parkinson’s disease; DLB: dementia with Lewy bodies; HC:  
12 healthy controls; MoCA: Montreal Cognitive Assessment; UPDRS: Unified Parkinson  
13 Disease Rating Scale; LEDD: Levodopa equivalent daily dose.

14

### 15 3.2. General description of clusters

16 The hierarchical clustering analysis distributed study participants in three clusters:  
17 cluster 1 “normal-to-mild” (N=45), cluster 2 “mild-to-moderate” (N=23) and cluster 3  
18 “severe” (N=32). Table 2 shows the distribution of participants in the three clusters  
19 according to their diagnostic category and it also presents cluster differences for all  
20 variables included in the clustering. Table 3 shows cluster differences in other relevant  
21 variables and PD features not used for hierarchical clustering, which in fact were  
22 statistically significant for most comparisons, even after excluding HC.

1 **Table 2. Clusters of participants and their differences for variables used in HCA**

|                  |                            | <b>Cluster 1</b><br><i>Normal-to-mild</i> | <b>Cluster 2</b><br><i>Mild-to-moderate</i> | <b>Cluster 3</b><br><i>Severe</i> | <b>F/ Chi</b> | <b>p</b>          |
|------------------|----------------------------|-------------------------------------------|---------------------------------------------|-----------------------------------|---------------|-------------------|
| No. participants | All                        | 45                                        | 23                                          | 32                                | ---           | ---               |
|                  | HC                         | 24                                        | 6                                           | 0                                 | ---           | ---               |
|                  | E46K-SNCA asymptomatic     | 2                                         | 0                                           | 0                                 | ---           | ---               |
|                  | E46K-SNCA symptomatic      | 1                                         | 1                                           | 3                                 | ---           | ---               |
|                  | LRRK2                      | 2                                         | 0                                           | 1                                 | ---           | ---               |
|                  | PARK2                      | 2                                         | 1                                           | 1                                 | ---           | ---               |
|                  | iPD                        | 14                                        | 15                                          | 19                                | ---           | ---               |
|                  | DLB                        | 0                                         | 0                                           | 8                                 | ---           | ---               |
|                  | Demographics               | Age (years)                               | 47.83 (10.22)                               | 61.37 (4.90)                      | 67.95 (6.77)  | .59.60            |
| Cognition        | Attention & working memory | .67 (.52)                                 | -.12 (.58)                                  | -.87 (.54)                        | 72.58         | .000<br>a,b,c     |
|                  | Executive                  | .59 (.38)                                 | -.06 (.61)                                  | -.76 (.88)                        | 40.99         | .000<br>a,b,c     |
|                  | Language                   | .59 (.48)                                 | -.02 (.74)                                  | -.80 (.66)                        | 46.93         | .000<br>a,b,c     |
|                  | Memory                     | .68 (.49)                                 | .08 (.47)                                   | -1.07 (.56)                       | 105.23        | .000<br>a,b,c     |
|                  | Visuospatial               | .55 (.33)                                 | .10 (.44)                                   | -.77 (.85)                        | 48.34         | .000<br>a,b,c     |
|                  | Processing speed           | .73 (.60)                                 | -.01 (.49)                                  | -1.05 (.50)                       | 91.91         | .000<br>a,b,c     |
| Neuropsychiatry  | Depression (GDS)           | 1.27 (1.54)                               | 3.04 (2.77)                                 | 4.16 (3.64)                       | 11.43         | .000<br>b,c       |
| Olfaction        | BSIT (#correct out of 12)  | 9.75 (1.60)                               | 7.61 (2.53)                                 | 5.43 (2.63)                       | 33.90         | .000<br>a,b,c     |
| Dysautonomia     | Valsalva PRT (sec)         | 2.17 (1.66)                               | 3.17 (2.82)                                 | 4.14 (4.87)                       | 3.40          | .037 <sup>b</sup> |
|                  | HRVdb                      | 1.05 (.10)                                | .98 (.08)                                   | .90 (.05)                         | 18.78         | .000<br>a,b,c     |
|                  | Orthostatic Hypotension    | 8 (32%)                                   | 5 (23%)                                     | 5 (45%)                           | 2.85          | .063 <sup>d</sup> |
| Vision           | LCVA (#correct letters)    | 37.97 (5.29)                              | 31.08 (5.79)                                | 15.45 (12.65)                     | 65.65         | .000<br>a,b,c     |
|                  | PCS (logMar)               | 2.10 (.09)                                | 1.93 (.10)                                  | 1.84 (.14)                        | 47.73         | .000<br>a,b,c     |

2  
3 Results are presented as means (standard deviations) unless otherwise specified. Pairwise  
4 cluster comparisons were performed using with post-hoc  $\chi^2$  tests or Tukey's range test,  
5 respectively. Statistically significant ( $p < 0.05$ ) results for pairwise cluster comparisons  
6 with  $\chi^2$  (proportions) or one-way ANOVA (means) are represented as: "a" cluster 3  
7 versus cluster 2; "b" cluster 3 vs cluster 1; "c" cluster 2 vs cluster 1; "d" tendency for  
8 statistical significance ( $p = 0.063$ ) for cluster 2 vs cluster 1. Abbreviations: E46K-SNCA:  
9 E46K mutation in alpha-synuclein gene; "E46K-SNCA asymptomatic": asymptomatic

1 carriers of E46K-SNCA; “E46K-SNCA symptomatic”: symptomatic carriers of E46K  
 2 mutation in alpha-synuclein gene; LRRK2: carriers of Leucine-Rich Repeat Kinase 2  
 3 gene mutations; PARK2: carriers of mutations in Parkin gene; iPD: idiopathic  
 4 Parkinson’s disease; DLB: dementia with Lewy bodies; HC: healthy controls; GDS:  
 5 Geriatric Depression Scale; BSIT: Brief Smell Identification Test; PRT: blood pressure  
 6 recovery time; HRVdb heart rate response (variability) to deep breathing; LCVA:  
 7 binocular low contrast visual acuity (2.5% Sloan charts); PCS: photopic contrast  
 8 sensitivity (Pelli-Robson chart). See methods for further details on used protocols for  
 9 clinical evaluations.

10

11 **Table 3. Differences in PD features and variables not included in HCA**

| No. participants | All                         | Cluster 1           | Cluster 2          | Cluster 3        | F/ Chi | p                 |
|------------------|-----------------------------|---------------------|--------------------|------------------|--------|-------------------|
|                  |                             | 45                  | 23                 | 32               | ---    | ---               |
| Demographics     | Males, no (%)               | 26 (57.77)          | 17 (73.91)         | 19 (59.37)       | 1.82   | .403              |
|                  | Education (years)           | 14.51<br>(4.43)     | 10.78 (3.26)       | 8.94 (4.21)      | 18.14  | .000<br>b,c       |
| Cognition        | Overall cognition (MoCA)    | 27.60<br>(1.98)     | 25.65 (2.24)       | 20.28 (5.01)     | 46.69  | .000<br>a,b       |
| Neuropsychiatry  | Apathy (LARS)               | -30.00<br>(5.13)    | -26.80<br>(5.41)   | -20.80<br>(8.59) | 6.32   | .005 <sup>b</sup> |
|                  | Fatigue (FSS)               | 25.58<br>(13.88)    | 27.74<br>(16.37)   | 36.10<br>(15.77) | 4.63   | .012 <sup>b</sup> |
| PD features*     | Disease duration            | 5.58 (5.15)         | 5.48 (4.13)        | 8.02 (4.43)      | 2.49   | .090              |
|                  | Age of disease onset        | 42.61<br>(9.52)     | 54.60 (5.24)       | 59.89 (8.22)     | 27.88  | .000<br>b,c       |
|                  | UPDRS I                     | 1.20 (1.16)         | 2.06 (1.64)        | 3.86 (2.20)      | 13.98  | .000<br>a,b       |
|                  | UPDRS II                    | 8.45 (6.31)         | 9.82 (5.49)        | 16.55 (6.18)     | 12.95  | .000<br>a,b       |
|                  | UPDRS III                   | 20.90<br>(13.05)    | 23.00<br>(10.07)   | 34.48<br>(10.43) | 10.47  | .000<br>a,b       |
|                  | UPDRS III- limbs subscore   | 5.85 (4.60)         | 7.24 (3.54)        | 12.03 (4.17)     | 11.96  | .003<br>a,b       |
|                  | UPDRS III- axial subscore   | 15.05<br>(8.96)     | 15.76 (7.07)       | 22.79 (8.10)     | 22.50  | .000<br>a,b       |
|                  | UPDRS IV                    | 3.65 (3.12)         | 3.71 (3.04)        | 4.76 (4.33)      | .70    | .500              |
|                  | Hoehn & Yahr (no. patients) |                     |                    |                  | 21.77  | .040 <sup>b</sup> |
|                  | Stage 0                     | 2 (9.52)            | 1 (5.88)           | 0                |        |                   |
|                  | Stage 1                     | 5 (23.80)           | 2 (11.76)          | 1 (3.12)         |        |                   |
|                  | Stage 1.5                   | 4 (19.05)           | 2 (11.76)          | 0                |        |                   |
|                  | Stage 2                     | 8 (38.09)           | 6 (35.29)          | 6 (18.75)        |        |                   |
|                  | Stage 2.5                   | 3 (14.29)           | 4 (23.53)          | 14 (43.75)       |        |                   |
|                  | Stage 3                     | 1 (4.76)            | 2 (11.76)          | 10 (31.25)       |        |                   |
| Stage 4          | 0                           | 0                   | 1 (3.12)           |                  |        |                   |
| Stage 5          | 0                           | 0                   | 0                  |                  |        |                   |
| LEDD (mg/day)    | 486.98<br>(348.58)          | 568.733<br>(417.08) | 733.29<br>(424.74) | 2.34             | .105   |                   |

1  
2 Results are presented as means (standard deviations) unless otherwise specified. \* Results  
3 for PD features are calculated exclusively for patients. Pairwise cluster comparisons were  
4 performed using with post-hoc  $\chi^2$  tests or Tukey's range test, respectively. Statistically  
5 significant ( $p < 0.05$ ) results for pairwise cluster comparisons with  $\chi^2$  (proportions) or one-  
6 way ANOVA (means) are represented as: "a" cluster 3 versus cluster 2; "b" cluster 3 vs  
7 cluster 1; "c" cluster 2 vs cluster 1. Abbreviations: MoCA: Montreal Cognitive  
8 Assessment; LARS: Lille Apathy Rating Scale; FSS: Fatigue Severity Scale; UPDRS:  
9 Unified Parkinson Disease Rating Scale; LEDD: levodopa equivalent daily dose. See  
10 methods for further details on used protocols for clinical evaluations.  
11  
12

13 Overall, clustering analysis separated participants according to a non-motor  
14 manifestations severity grading in which cluster 3 "*severe*" accounted for the most  
15 affected subjects, cluster 2 "*mild-to-moderate*" for those in an intermediate clinical status  
16 and cluster 1 "*normal-to-mild*" for those that were less disabled. Cluster 3 "*severe*"  
17 included old ( $>60$  years) iPD patients (40%) classified together with all DLB and the most  
18 symptomatic E46K-SNCA carriers, corresponding to the most aggressive idiopathic and  
19 genetic LB diseases (100% of DLB and 60% of E46K-SNCA symptomatic carriers) and  
20 it did not include any HC. Cluster 2 "*mild-to-moderate*" included old ( $>60$  years) iPD  
21 patients (32%) classified together with one symptomatic E46K-SNCA carrier and with  
22 HC (20% and 20% respectively). Finally, Cluster 1 "*Normal-to-mild*" included young ( $<$   
23 60 years) iPD patients (28%) classified together with most HC (80%) and the absent and  
24 variant LB burden genetic PD variants (PARK2 and LRRK2).

25 In Figure 1-A, we can observe the PCA and LDA representation plots with the  
26 individual distribution of study participants according to their performance in the non-  
27 motor clinical features used for clustering analysis. Accordingly, we may observe  
28 comparable PCA and LDA coordinates within cluster 3 for DLB and E46K-SNCA  
29 symptomatic carriers and within cluster 1 for PARK2, LRRK2, asymptomatic E46K-  
30 SNCA carriers and HC. Interestingly, the E46K-SNCA symptomatic carrier with an  
31 isolated pure autonomic failure was situated in the moderate phenotype cluster (cluster 2)

1 and the young E46K-SNCA carrier with mild PD manifestations was situated together  
2 with asymptomatic E46K-SNCA carriers in the mild phenotype cluster (cluster 1).

3

4 **Fig 1. Biplots and radial plot of the three identified clusters in the hierarchical**  
5 **clustering analysis.**

6 **a. Biplots for principal component analysis and linear discriminant analysis.** PCA

7 and LDA biplots representing individual distribution of study participants according to  
8 their performance in the non-motor clinical features used for HCA. Points that are close  
9 together in PCA and LDA biplots correspond to observations that have similar scores on  
10 the components displayed in the plot. See main text (Results section) for further  
11 interpretation of results in the figure. Abbreviations: PCA: Principal Component Analysis;  
12 LDA: Linear Discriminant Analysis; iPD: idiopathic Parkinson's Disease; DLB:  
13 Dementia with Lewy bodies; E46K-SNCA: carriers of E46K mutation of alpha-synuclein  
14 gene (SNCA); PARK2: carriers of mutations in Parkin gene; LRRK2: carriers of Leucine-  
15 Rich Repeat Kinase 2 gene mutations.

### 16 **3.2.1. Non-motor symptoms**

17 Regarding demographical variables, patients in cluster 1 were markedly younger,  
18 with higher education and earlier disease onset as compared to those in other clusters. In  
19 terms of non-motor features, we also observed significant differences for all pairwise  
20 cluster comparisons in neuropsychological, olfactory, autonomic and visual features, with  
21 a gradient in which cluster 1 was the least affected, cluster 2 the clinically intermediate  
22 one and cluster 3 the most severely affected. Regarding neuropsychiatric manifestations,  
23 patients in cluster 1 were significantly less depressed, apathetic and fatigued as compared  
24 to cluster 1 and cluster 2, who had no significant differences. To identify specific patterns  
25 of non-motor features in the clusters, we plotted the magnitude of pairwise cluster

1 differences in average z scores (centroids) for each clinical variable included to perform  
2 hierarchical clustering analysis (Fig. 1-B). Interestingly, when cluster 3 was compared  
3 with cluster 1 and with cluster 2, we observed a peculiar pattern revealing marked  
4 differences in neuropsychological tests (visual attention, perception, processing speed  
5 and memory and executive functions), that was not present when differences between  
6 cluster 1 and cluster 2 were evaluated.

7

8 **Fig 1. Biplots and radial plot of the three identified clusters in the hierarchical**  
9 **clustering analysis.**

10 **b. Radial plot showing differences in clinical features between identified clusters.**

11 The magnitude of pairwise cluster differences in average z scores (centroids) for each  
12 clinical variable included to perform HCA are displayed in a radial plot. See main text  
13 (Results section) for further interpretation of results in the figure. Abbreviations: TMTA:  
14 Trail Making Test A; DSb: Digit Span Backwards test; MWCST\_C: Modified Wisconsin  
15 Card Sorting Test (Categories); TMTB: Trail Making Test B; SF: Calibrated Ideational  
16 Fluency Assessment semantic fluency; LF: Calibrated Ideational Fluency Assessment  
17 letter fluency; HVLT: Hopkins Verbal Learning Test; BVMT: Brief Visual Memory Test;  
18 BJLOTH: Benton's Judgment of Line Orientation Test (H-form); CDTo: Clock Drawing  
19 Test order; SDMT: Symbol Digit Modalities Test; SPCT: Salthouse Perceptual  
20 Comparison Test; GDS: Geriatric Depression Scale; BSIT: Brief Smell Identification  
21 Test; LCVA: low contrast visual acuity; PCS: Photopic Contrast Sensitivity; HRVdb:  
22 heart rate response (variability) to deep breathing; OHT: Orthostatic Hypotension; PRT:  
23 blood Pressure Recovery Time.

24 **3.2.2. Motor symptoms and PD-related features**



1           Regarding PD-related features, patients in cluster 1 presented earlier disease onset  
2 as compared to those in other clusters. Although patients in cluster 3 had longer disease  
3 duration as compared to participants in other clusters, the cluster differences for this  
4 variable were not statistically significant. Thus, we did not include disease duration as a  
5 covariate in subsequent analyses. The severity of motor PD manifestations was markedly  
6 higher in patients from cluster 3 as compared to those from clusters 1 and 2 ( $p<0.05$ ),  
7 while it was comparable between cluster 1 and cluster 2. Although there was a progressive  
8 increase of LEDD as motor manifestations increased from cluster 1 to cluster 3, cluster  
9 differences in LEDD were not statistically significant. Interestingly, axial motor  
10 manifestations were significantly more severe for patients in cluster 3 as compared to  
11 cluster 1 and cluster 2.

### 12 **3. DISCUSSION**

13           To the best of our knowledge, this is the first attempt to explore the heterogeneity  
14 of idiopathic LB diseases using a data driven classification approach with an extensive  
15 set of cognitive and other non-motor features. Additionally, we included three  
16 pathophysiological and clinically distinct genetic PD variants known for having different  
17 degrees of LB disease in the CNS: PARK2 (absent LB pathology), LRRK2 (variable LB  
18 pathology) and E46K-SNCA (severe LB pathology). Our clustering analyses identified  
19 three groups of patients classified irrespective of disease duration: Cluster 1 or “*Normal-*  
20 *to-mild*” included young iPD, most HC and the lowest LB burden genetic PD variants  
21 (PARK2 and LRRK2) characterized by having normal-to-mild cognitive disabilities and  
22 mild-to-moderate motor disability with few axial symptoms; Cluster 2 or “*Mild-to-*  
23 *moderate*” included old iPD patients, one symptomatic E46K-SNCA carrier and HC,  
24 characterizing by having mild-to-moderate cognitive and motor disabilities with few axial  
25 symptoms; Cluster 3 or “*Severe*” included old iPD, all DLB and the most symptomatic



1 E46K-SNCA carriers, characterized by having severe pattern-specific cognitive  
2 disabilities (visual attention, perception, processing speed, memory and executive  
3 functions) and severe motor PD manifestations with marked axial symptoms. According  
4 to our HCA, the clinical pattern observed in cluster 3 may correspond to iPD with higher  
5 LB pathology burden since all DLB and most symptomatic E46K-SNCA carriers were  
6 included in cluster 3. Similar results were found in other studies that showed a cluster of  
7 PD patients with severe motor symptoms, orthostatic hypotension, cognitive impairment,  
8 REM sleep behavior disorder, and neuropsychiatric symptoms [4].

9       Until now, few publications have used clustering analyses to identify PD subtypes  
10 based on non-motor symptoms [3, 33-35]. In such studies, three or four subtypes of PD  
11 patients were usually identified, including the phenotypes “old age onset and rapid  
12 disease progression” and “young age onset and slow disease progression”, which may  
13 correspond respectively to the PD phenotypes identified in the present work as cluster 3  
14 and cluster 1. Furthermore, our study suggested the existence of a specific PD phenotype  
15 (cluster 3) that was identified irrespective of disease duration and which included marked  
16 axial motor manifestations and severe non-motor disability.

17       Moreover, in our study, Valsalva PRT, a recognized early biomarker of  
18 dysautonomia [25], was an important variable to differentiate the three clusters. In line  
19 with the concept of dysautonomia and aggressive LB disease phenotypes, Kaufmann et  
20 al. [36] reported the natural history of 100 patients with pure autonomic failure (a rare  
21 synucleinopathy characterized by the presence of severe isolated dysautonomia). In the  
22 study, after 4 years of follow-up most of the patients that phenoconverted to a diffuse  
23 synucleinopathy did so to DLB, which is characterized by the collection of clinical  
24 features mainly represented in cluster 3 of our study. Considering that cluster 3 included  
25 not only all DLB patients but also the most symptomatic E46K-SNCA carriers, our

1 findings support the idea that iPD patients with the aforementioned motor and non-motor  
2 phenotype may correspond to aggressive diffuse LB diseases. Remarkably, although  
3 visuospatial cognitive disability was not the most prominent cognitive feature in cluster  
4 3, most of the non-motor features of cluster 3 are predominantly related to visual  
5 cognition. This concept connects with previous evidence supporting that early visual  
6 cognitive dysfunction is one of the main predictors for the development of cognitive  
7 disability in PD [37, 38]. Processing speed is a cognitive domain that is not usually  
8 included in the definition criteria for PD-MCI, but numerous studies have found that the  
9 presence of processing speed alterations are widely present in PD, being associated with  
10 impairments in daily living activities [39].

11         However, some limitations should be considered in our study. First, although the  
12 inclusion of genetic PD variants in the clustering analysis is one of the highlights of the  
13 present work, the sample size of each genetic group is small, which may limit the  
14 statistical power and generalizability of study results. However, it is important to remark  
15 that SNCA-linked mutations are considered a rare condition as they are limited to specific  
16 families and series around the world and their study is a unique opportunity to improve  
17 our understanding of the pathophysiology underlying the different phenotypes of LB  
18 diseases [11]. Second, it is important to consider the limitations regarding the intrinsic  
19 variability of clustering analyses. Third, the mutual relationship between processing  
20 speed, executive functions, visuospatial cognition and their decline with chronological  
21 age may have influenced the classification of study participants. Fourth, although we  
22 performed a comprehensive evaluation of several motor and non-motor clinical features,  
23 we were not able to assess the presence of RBD in our study population, an important  
24 feature known to be highly predictive of the development of aggressive LB diseases.  
25 Moreover, since statistically significant cluster differences persisted even after removing

1 the effect of chronological age on cognitive performance, we cannot completely rule out  
2 the effect of age in our analyses, which is in fact a determinant feature conditioning  
3 neurodegeneration in PD. Finally, our results are based on cross-sectional data.  
4 Therefore, further longitudinal studies are required to investigate whether members of  
5 different clusters reveal various course of progression or outcome over time.

6 In conclusion, our clustering analysis, based on an extensive set of non-motor  
7 features and including HC, iPD, DLB and three pathophysiological and clinically distinct  
8 genetic PD variants differentiated three clusters of profiles in LB diseases. First, “*Normal-*  
9 *to-mild*” cluster with young iPD patients, most HC and the lowest LB burden genetic PD  
10 variants (PARK2 and LR RK2) characterized by having normal-to-mild cognitive  
11 disabilities and mild-to-moderate motor disability with few axial symptoms; “*Mild-to-*  
12 *moderate*” cluster with old iPD patients classified together with the lowest symptomatic  
13 E46K-SNCA carrier and with HCs, characterizing by having mild-to-moderate cognitive  
14 and motor disabilities with few axial symptoms; and “*Severe*” cluster with old iPD  
15 classified together with all DLB and the most symptomatic E46K-SNCA carriers,  
16 characterized by having severe pattern-specific cognitive disabilities (visual attention,  
17 perception, processing speed, memory and executive functions) and severe motor PD  
18 manifestations with marked axial symptoms. Hence, our study with genetic PD patients  
19 supports the potential value of quantifying non-motor PD features in the clinical setting,  
20 particularly visual cognition abnormalities, to help in the identification of those iPD  
21 patients at higher risk of developing an aggressive diffuse LB diseases.

22

1    **Acknowledgment:** We would like to thank ASPARBI and all of the participants in the  
2    study for making this research possible.

3    **Conflict of interest / Study funding:** None of the authors have any conflicts of interest  
4    to report. This study was co-funded by Michael J. Fox Foundation [RRIA 2014 (Rapid  
5    Response Innovation Awards) Program (Grant ID: 10189)] and Instituto de Salud Carlos  
6    III through the project “PI14/00679” and Juan Rodes grant “JR15/00008” (IG) (Co-  
7    funded by European Regional Development Fund/European Social Fund - "Investing in  
8    your future").

## 1 REFERENCES

- 2 1. Zetuský, W.J., J. Jankovic, and F.J. Pirozzolo, The heterogeneity of Parkinson's  
3 disease: clinical and prognostic implications. *Neurology* 1985;35(4):522-6.
- 4 2. Jankovic, J., et al., Variable expression of Parkinson's disease: a base-line analysis of  
5 the DATATOP cohort. The Parkinson Study Group. *Neurology* 1990;40(10):1529-34.
- 6 3. Pont-Sunyer, C., et al., The onset of nonmotor symptoms in Parkinson's disease (the  
7 ONSET PD study). *Mov Disord* 2015;30(2):229-37.
- 8 4. Fereshtehnejad, S.M., et al., New Clinical Subtypes of Parkinson Disease and Their  
9 Longitudinal Progression: A Prospective Cohort Comparison With Other Phenotypes.  
10 *JAMA Neurol* 2015;72(8):863-73.
- 11 5. Sauerbier, A., et al., Non motor subtypes and Parkinson's disease. *Parkinsonism Relat*  
12 *Disord* 2016;22(Suppl 1):S41-6.
- 13 6. Berg, D., et al. Time to redefine PD? Introductory statement of the MDS Task Force  
14 on the definition of Parkinson's disease. *Movement Disorders* 2014; 29(4):454-462.
- 15 7. Fereshtehnejad, S.M., et al., Clinical criteria for subtyping Parkinson's disease:  
16 biomarkers and longitudinal progression. *Brain* 2017;140(7):1959-1976.
- 17 8. Ma, L.Y., et al., Heterogeneity among patients with Parkinson's disease: cluster  
18 analysis and genetic association. *J Neurol Sci* 2015;351(1-2):41-45.
- 19 9. Nalls, M.A., et al., Diagnosis of Parkinson's disease on the basis of clinical and genetic  
20 classification: a population-based modelling study. *Lancet Neurol*, 2015. 14(10): p. 1002-  
21 9.
- 22 10. Nalls, M.A., et al., Large-scale meta-analysis of genome-wide association data  
23 identifies six new risk loci for Parkinson's disease. *Nat Genet*, 2014. 46(9): p. 989-93.
- 24 11. Zarranz, J.J., et al., The new mutation, E46K, of alpha-synuclein causes Parkinson  
25 and Lewy body dementia. *Ann Neurol* 2004;55(2):164-73.

- 1 12. Inigo-Marco, I., et al., E46K alpha-synuclein pathological mutation causes cell-  
2 autonomous toxicity without altering protein turnover or aggregation. *Proc Natl Acad Sci*  
3 *U S A* 2017;114(39):E8274-E8283.
- 4 13. Nasreddine, Z.S., et al., The Montreal Cognitive Assessment, MoCA: a brief  
5 screening tool for mild cognitive impairment. *J Am Geriatr Soc*, 2005. 53(4): p. 695-9.
- 6 14. Litvan, I., et al., Diagnostic criteria for mild cognitive impairment in Parkinson's  
7 disease: Movement Disorder Society Task Force guidelines. *Mov Disord*, 2012. 27(3): p.  
8 349-56.
- 9 15. D, W., Wechsler Memory Scale. third edition ed. 1997, San Antonio, TX: The  
10 Psychological Corporation.
- 11 16. Reitan, R.M., Validity of the Trail Making Test as an indicator of organic brain  
12 damage. *Perceptual and Motor Skills*, 1958. 8: p. 271-276.
- 13 17. Del Pino et al. Test modificado de clasificación de tarjetas de Wisconsin:  
14 normalización y estandarización de la prueba en población española. *Revista de*  
15 *Neurología*, 2016, vol. 62, no 5, p. 193-202.
- 16 18. Vannorsdall, T.D., et al., Ideational fluency as a domain of human cognition.  
17 *Neuropsychology*, 2012. 26(3): p. 400-5.
- 18 19. Benedict, R.H.B., Schretlen, D., Groninger, L., Brandt, J. , Hopkins Verbal Learning  
19 Test—Revised: Normative data and analysis of inter-form and test–retest reliability.  
20 *Clinical Neuropsychologist*, 1998. 12(1): p. 43-55.
- 21 20. Benedict, R.S., D; Groninger, L; Dobraski, M; Shpritz, B, Revision of the Brief  
22 Visuospatial Memory Test: Studies of normal performance, reliability, and validity.  
23 *Psychological Assessment*, 1996. 8(2): p. 145-153.
- 24 21. O, B.A.H.K.V.N.S., Contributions to Neuropsychological Assessment: A Clinical  
25 Manual. 1983, New York: Oxford University Press.

- 1 22. Thalman B, S.R., Stähelin HB, Brubacher D, Ermini-Fünfschilling D, Bläsi S,  
2 Monsch AU, Dementia screening in general practice: optimised scoring for the Clock  
3 Drawing Test. *Brain Aging*, 2002. 2: p. 36–43.
- 4 23. Smith, A., Symbol Digit Modalities Test (SDMT). Manual (Revised). 1982, Los  
5 Angeles: Western Psychological Services.
- 6 24. Pena, J., et al., The Salthouse Perceptual Comparison Test: normalization and  
7 standardization for Spanish population. *Rev Neurol* 2016;62(1):13-22.
- 8 25. Vogel, E.R., P. Sandroni, and P.A. Low, Blood pressure recovery from Valsalva  
9 maneuver in patients with autonomic failure. *Neurology* 2005;65(10):1533-7.
- 10 26. Heart rate variability: standards of measurement, physiological interpretation and  
11 clinical use. Task Force of the European Society of Cardiology and the North American  
12 Society of Pacing and Electrophysiology. *Circulation* 1996;93(5):1043-65.
- 13 27. Doty, R.L., A. Marcus, and W.W. Lee, Development of the 12-item Cross-Cultural  
14 Smell Identification Test (CC-SIT). *Laryngoscope* 1996;106(3):353-6.
- 15 28. de Craen, A.J., T.J. Heeren, and J. Gussekloo, Accuracy of the 15-item geriatric  
16 depression scale (GDS-15) in a community sample of the oldest old. *Int J Geriatr*  
17 *Psychiatry* 2003;18(1):63-6.
- 18 29. Sockeel, P., et al., The Lille apathy rating scale (LARS), a new instrument for  
19 detecting and quantifying apathy: validation in Parkinson's disease. *J Neurol Neurosurg*  
20 *Psychiatry* 2006;77(5):579-84.
- 21 30. Krupp, L.B., et al., The fatigue severity scale. Application to patients with multiple  
22 sclerosis and systemic lupus erythematosus. *Arch Neurol* 1989;46(10):1121-3.74.
- 23 31. Tomlinson, C.L., et al., Systematic review of levodopa dose equivalency reporting in  
24 Parkinson's disease. *Mov Disord* 2010;25(15):2649-53.

- 1 32. Pedregosa F; Varoquaux G; Gramfort A; Michel A; Thirion B; Grisel O; Blondel M;  
2 Prettenhofer P; Weiss R; Dubourg V; Vanderplas J; Passos, A.C.D., Scikit-learn:  
3 Machine Learning in Python. *Journal of Machine Learning Research* 2011;12:2825-  
4 2830.
- 5 33. Erro, R., et al., Nonmotor predictors for levodopa requirement in de novo patients  
6 with Parkinson's disease. *Mov Disord* 2015;30(3):373-8.
- 7 34. Mu, J., et al., Parkinson's Disease Subtypes Identified from Cluster Analysis of Motor  
8 and Non-motor Symptoms. *Front Aging Neurosci* 2017;9:301.
- 9 35. Yang, H.J., et al., Identifying the clusters within nonmotor manifestations in early  
10 Parkinson's disease by using unsupervised cluster analysis. *PLoS One* 2014;9(3):e91906.
- 11 36. Kaufmann, H., et al., Natural history of pure autonomic failure: A United States  
12 prospective cohort. *Annals of neurology* 2017;81(2):287-297.
- 13 37. Williams-Gray, C.H., et al., Evolution of cognitive dysfunction in an incident  
14 Parkinson's disease cohort. *Brain* 2007;130(7):1787-98.
- 15 38. Anang, J.B., et al., Predictors of dementia in Parkinson disease: a prospective cohort  
16 study. *Neurology* 2014;83(14):1253-60.
- 17 39. Rosenthal, E., et al., Association between cognition and function in patients with  
18 Parkinson disease with and without dementia. *Mov Disord* 2010;25(9):1170-6.
- 19



**A**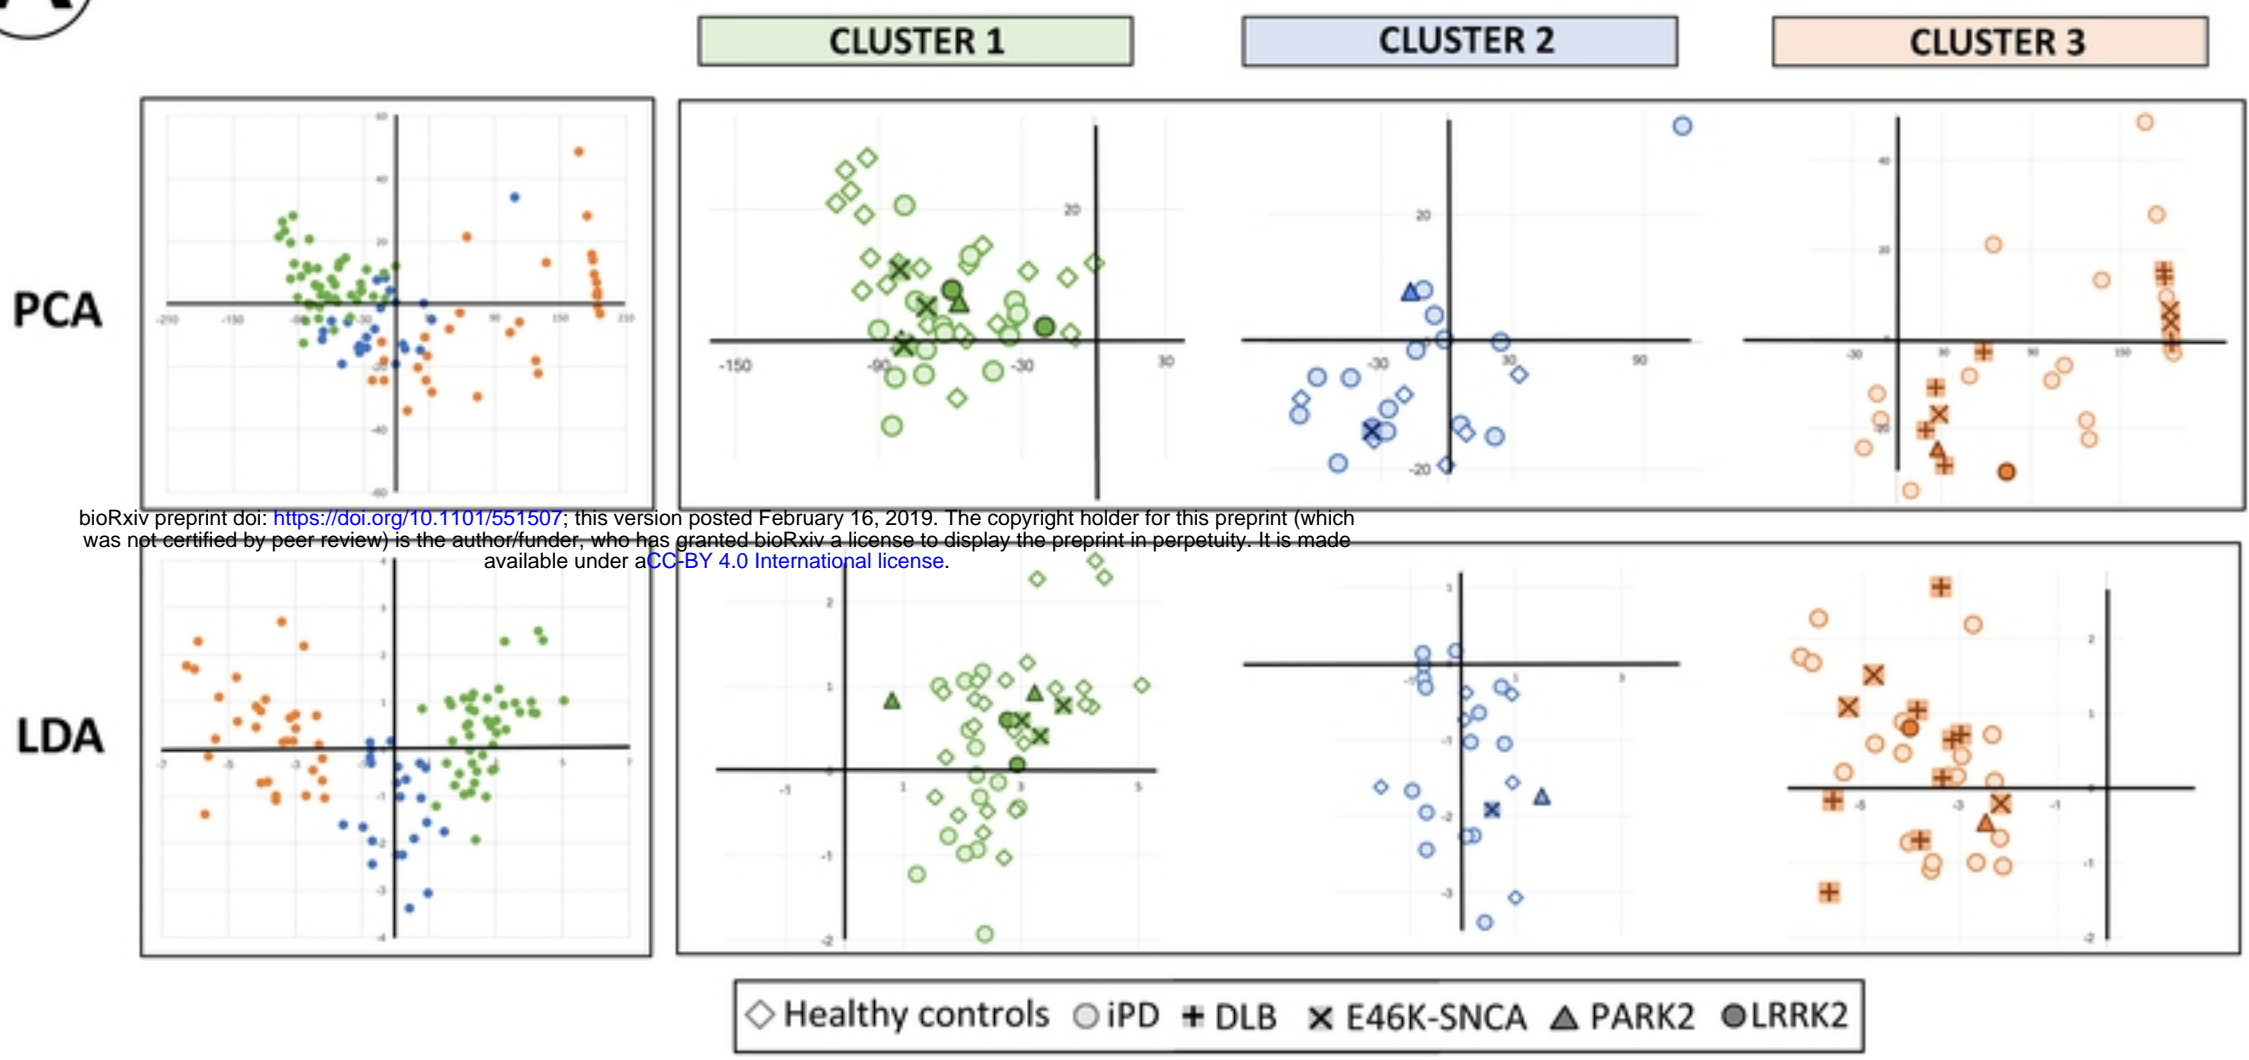**B**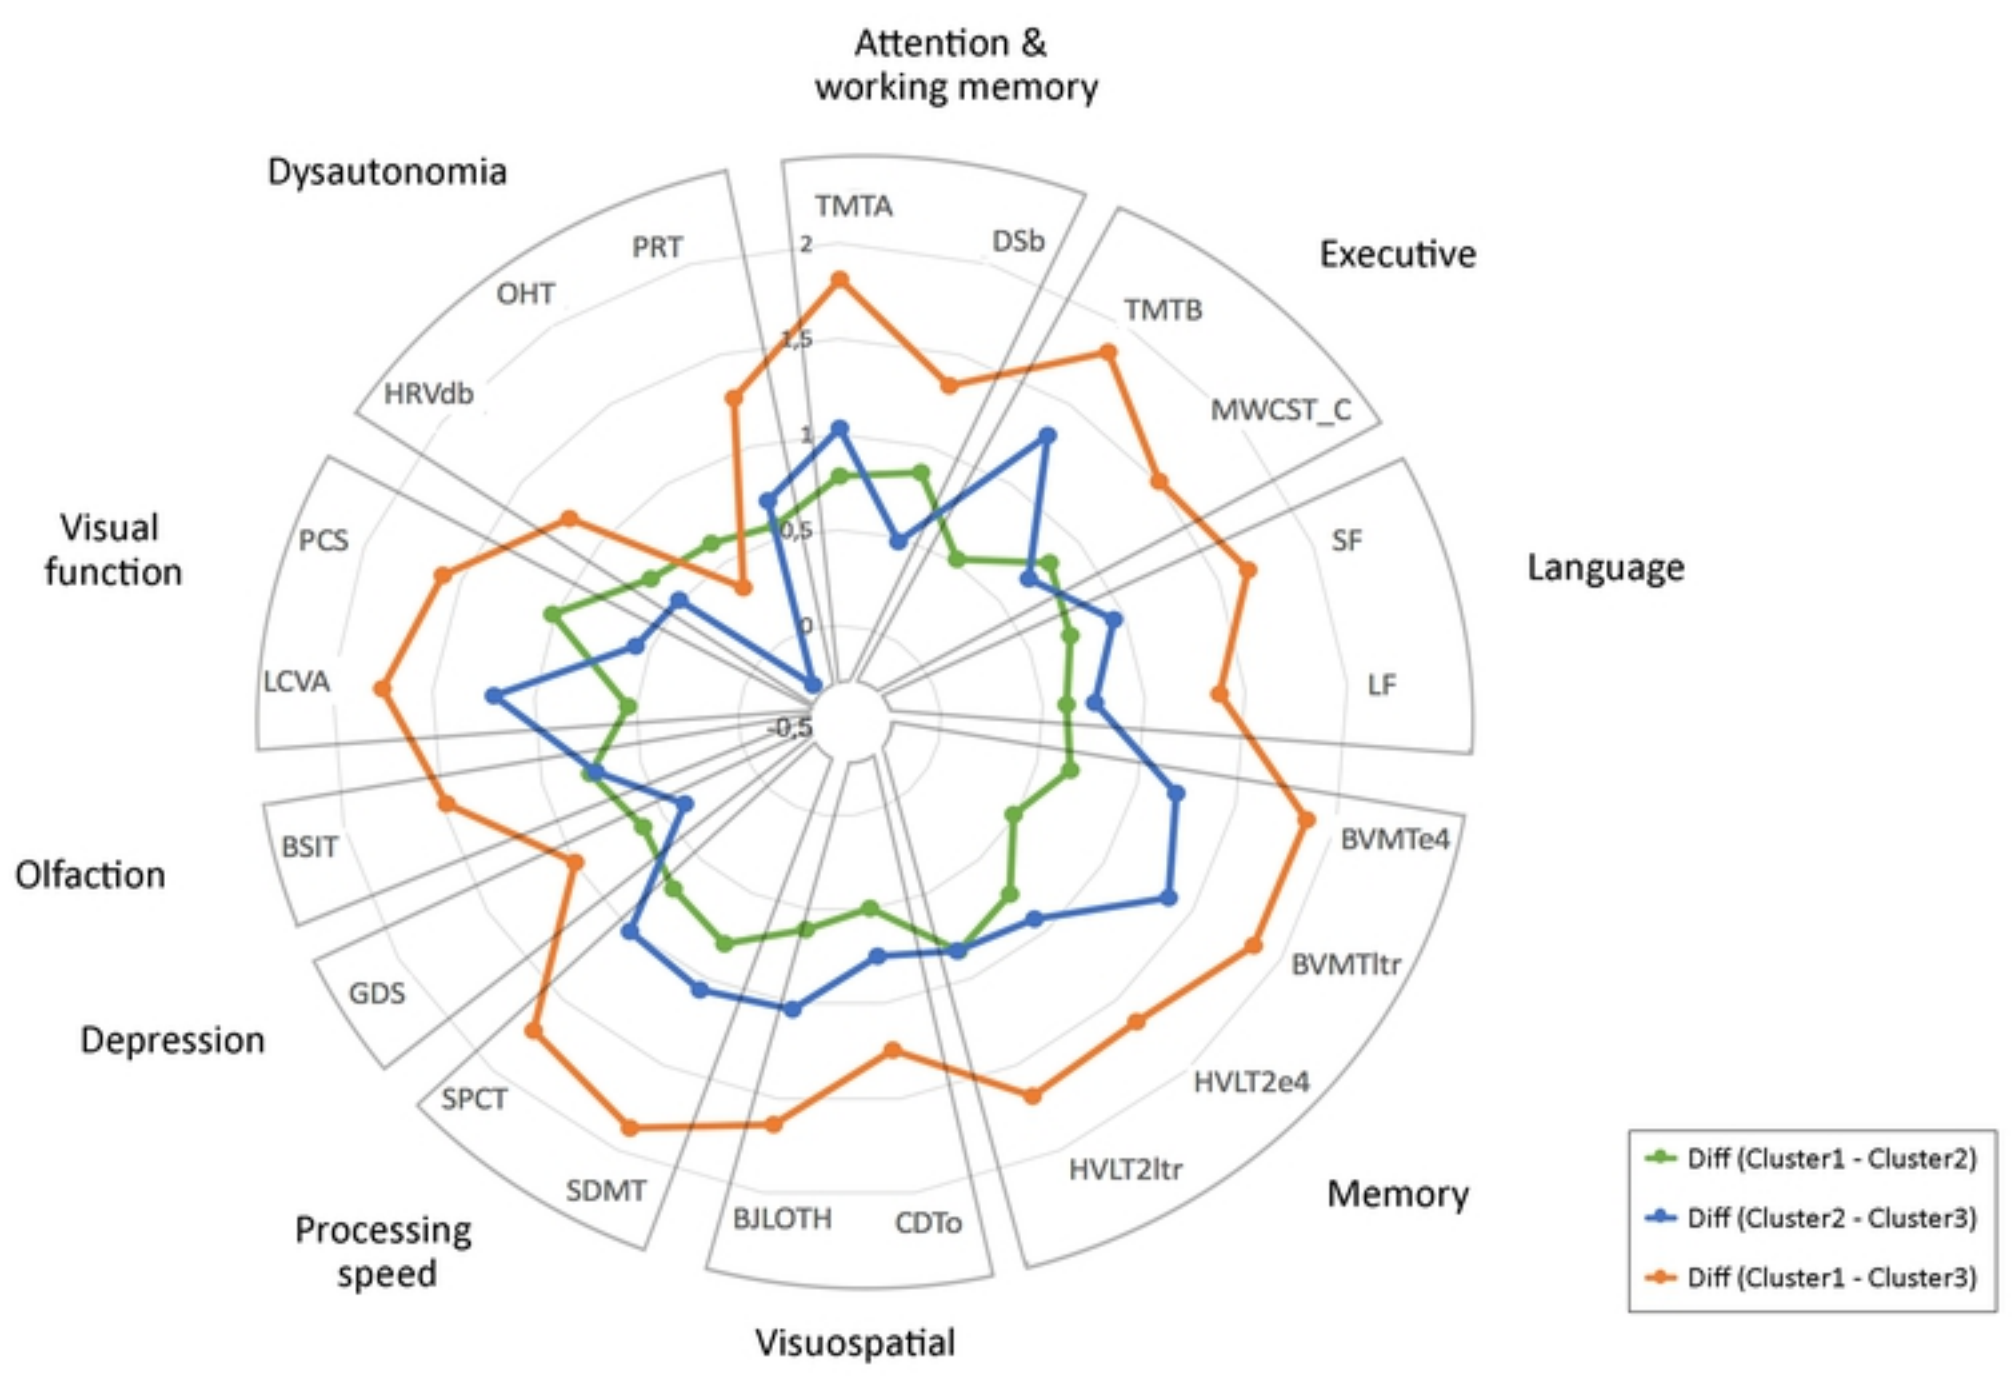

Fig 1
